# Supplementary material for: Risk of Diabetes in U.S. Military Service Members in Relation to Combat Deployment and Mental Health
Source: PubMed Central journal article supplement — Diabetes Care. 2010 May 18;33(8):1771–7. doi: 10.2337/dc10-0296 (PMC2909060; doi:10.2337/dc10-0296), 2010-05-18
Supplement: supp_dc10-0296_onlineappendix.pdf [file supp_dc10-0296_onlineappendix.pdf]

## ONLINE APPENDIX

Online Table 1: Baseline military occupation among nondiabetic persons by presence of new-onset diabetes at follow-up (N=44,754)

|                                           | No.  | N=44,378 | Yes | N=376  | Unadjusted odds ratio<br>(95% confidence<br>interval)* | P value |
|-------------------------------------------|------|----------|-----|--------|--------------------------------------------------------|---------|
| Occupation                                | n    | (%)      | n   | (%)    |                                                        |         |
| Combat specialists                        | 8864 | (20.4)   | 49  | (13.4) | 1.00                                                   | 0.0046  |
| Electronic equipment repair               | 4048 | (9.3)    | 28  | (7.7)  | 1.37 (0.88-2.14)                                       |         |
| Communications/intelligence               | 3080 | (7.1)    | 26  | (7.1)  | 1.46 (0.91-2.35)                                       |         |
| Health care                               | 4993 | (11.5)   | 42  | (11.5) | 1.50 (1.00-2.25)                                       |         |
| Other technical and allied                | 1086 | (2.5)    | 7   | (1.9)  | 1.12 (0.51-2.47)                                       |         |
| Functional support                        | 8732 | (20.1)   | 92  | (25.2) | <b>1.85 (1.31-2.60)</b>                                |         |
| Electrical mechanical equipment<br>repair | 5992 | (13.8)   | 51  | (14.0) | <b>1.50 (1.02-2.21)</b>                                |         |
| Craft workers                             | 1303 | (3.0)    | 12  | (3.3)  | 1.60 (0.85-3.01)                                       |         |
| Service and supply handlers               | 3572 | (8.2)    | 47  | (12.9) | <b>2.37 (1.60-3.52)</b>                                |         |
| Trainees/other                            | 1675 | (3.9)    | 11  | (3.0)  | 1.14 (0.59-2.18)                                       |         |

Abbreviations: OEF/OIF: Operation Enduring Freedom/Operation Iraqi Freedom; PTSD: posttraumatic stress disorder.

\*Bold values indicate statistical significance at  $p < 0.05$ .

Online Table 2. Relative odds of incident self-reported diabetes mellitus by military occupation at baseline adjusted for age, sex, race/ethnicity, education and body mass index (N=44,754)

| Baseline characteristic                | Odds ratios and 95% confidence intervals* | p value |
|----------------------------------------|-------------------------------------------|---------|
| Occupation                             |                                           | 0.0983  |
| Combat specialists                     | 1.00                                      |         |
| Electronic equipment repair            | 1.19 (0.76-1.87)                          |         |
| Communications/intelligence            | 1.40 (0.86-2.26)                          |         |
| Health care                            | 1.28 (0.83-1.97)                          |         |
| Other technical and allied             | 0.91 (0.41-2.02)                          |         |
| Functional support                     | 1.37 (0.95-1.97)                          |         |
| Electrical mechanical equipment repair | 1.18 (0.79-1.77)                          |         |
| Craft workers                          | 1.16 (0.61-2.22)                          |         |
| Service and supply handlers            | <b>1.99 (1.33-2.98)</b>                   |         |
| Trainees/other                         | 1.80 (0.93-3.50)                          |         |

Abbreviations: OEF/OIF: Operation Enduring Freedom/Operation Iraqi Freedom; PTSD: posttraumatic stress disorder.

\*Bold values indicate statistical significance at  $p < 0.05$ .

Online Table 3. Adjusted relative odds of incident self-reported diabetes mellitus (N=44,754) by military occupation at baseline. These variables were also included in the model shown in Table 3 of the published version.

| Baseline characteristic*               | Odds ratios and 95% confidence intervals <sup>†</sup> | p value |
|----------------------------------------|-------------------------------------------------------|---------|
| Occupation                             |                                                       | 0.122   |
| Combat specialists                     | 1.00                                                  |         |
| Electronic equipment repair            | 1.14 (0.73,1.80)                                      |         |
| Communications/intelligence            | 1.36 (0.84,2.20)                                      |         |
| Health care                            | 1.28 (0.83,1.98)                                      |         |
| Other technical and allied             | 0.85 (0.38,1.90)                                      |         |
| Functional support                     | 1.35 (0.94,1.95)                                      |         |
| Electrical mechanical equipment repair | 1.17 (0.78,1.75)                                      |         |
| Craft workers                          | 1.17 (0.61,2.22)                                      |         |
| Service and supply handlers            | <b>1.93 (1.29,2.90)</b>                               |         |
| Trainees/other                         | 1.78 (0.91,3.47)                                      |         |

Abbreviation: PTSD: posttraumatic stress disorder.

\*The multivariable model has been adjusted for each baseline characteristic listed in the published Table 3.

<sup>†</sup>Bold values indicate statistical significance at  $p < 0.05$ .
